# Supplementary material for: Dielectric and optical anisotropy enhanced by 1,3-dioxolane terminal substitution on tolane-liquid crystals
Source: Royal Society of Chemistry journal article supplement (doi:10.1039/c5tc01712b), 2015-01-01
Supplement: c5tc01712b1.pdf [file c5tc01712b1.pdf]

## Dielectric and optical anisotropy enhanced by 1,3-dioxolane terminal substitution on tolane-liquid crystals

Ran Chen,<sup>a</sup> Yi Jiang,<sup>b</sup> Jian Li,<sup>c</sup> Zhongwei An,<sup>\*a,c</sup> Xinbing Chen<sup>a</sup> and Pei Chen<sup>a</sup>

<sup>a</sup> Key Laboratory of Applied Surface and Colloid Chemistry, School of Materials Science and Engineering, Shaanxi Normal University, Xi'an 710119, China. E-mail: [gmecazw@163.com](mailto:gmecazw@163.com) (Z. An).

<sup>b</sup> Shaanxi University of Chinese Medicine, Xianyang, 712046, China.

<sup>c</sup> Xi'an Modern Chemistry Research Institute, Xi'an 710065, China.

### Electronic supplementary information

#### Table of contents

|                                                            |     |
|------------------------------------------------------------|-----|
| 1. General                                                 | S1  |
| 2. Compound structure characterization                     | S2  |
| 3. Table S1 and Fig. S6                                    | S13 |
| 4. Geometric data of molecular <b>2BF2</b> and <b>2TF2</b> | S15 |
| 5. Vuks equation                                           | S17 |
| 6. The simulated molecular structure of <b>2BF2V</b>       | S18 |
| 7. Compositions of mixtures SNULC-P01 and SNULC-P02        | S19 |

### 1. General

The <sup>1</sup>H NMR and <sup>13</sup>C NMR spectra were recorded on a spectrometer operating at 300 and 75 MHz. Full geometry optimizations have been carried out without imposing any constraints using the Gaussian 09 program package. Spin-restricted DFT calculations were carried out in the framework of the generalized gradient approximation (GGA) using B3LYP exchange-correlation functional and the 6-31G (d, p) basis set.

## 2. Compound structure characterization

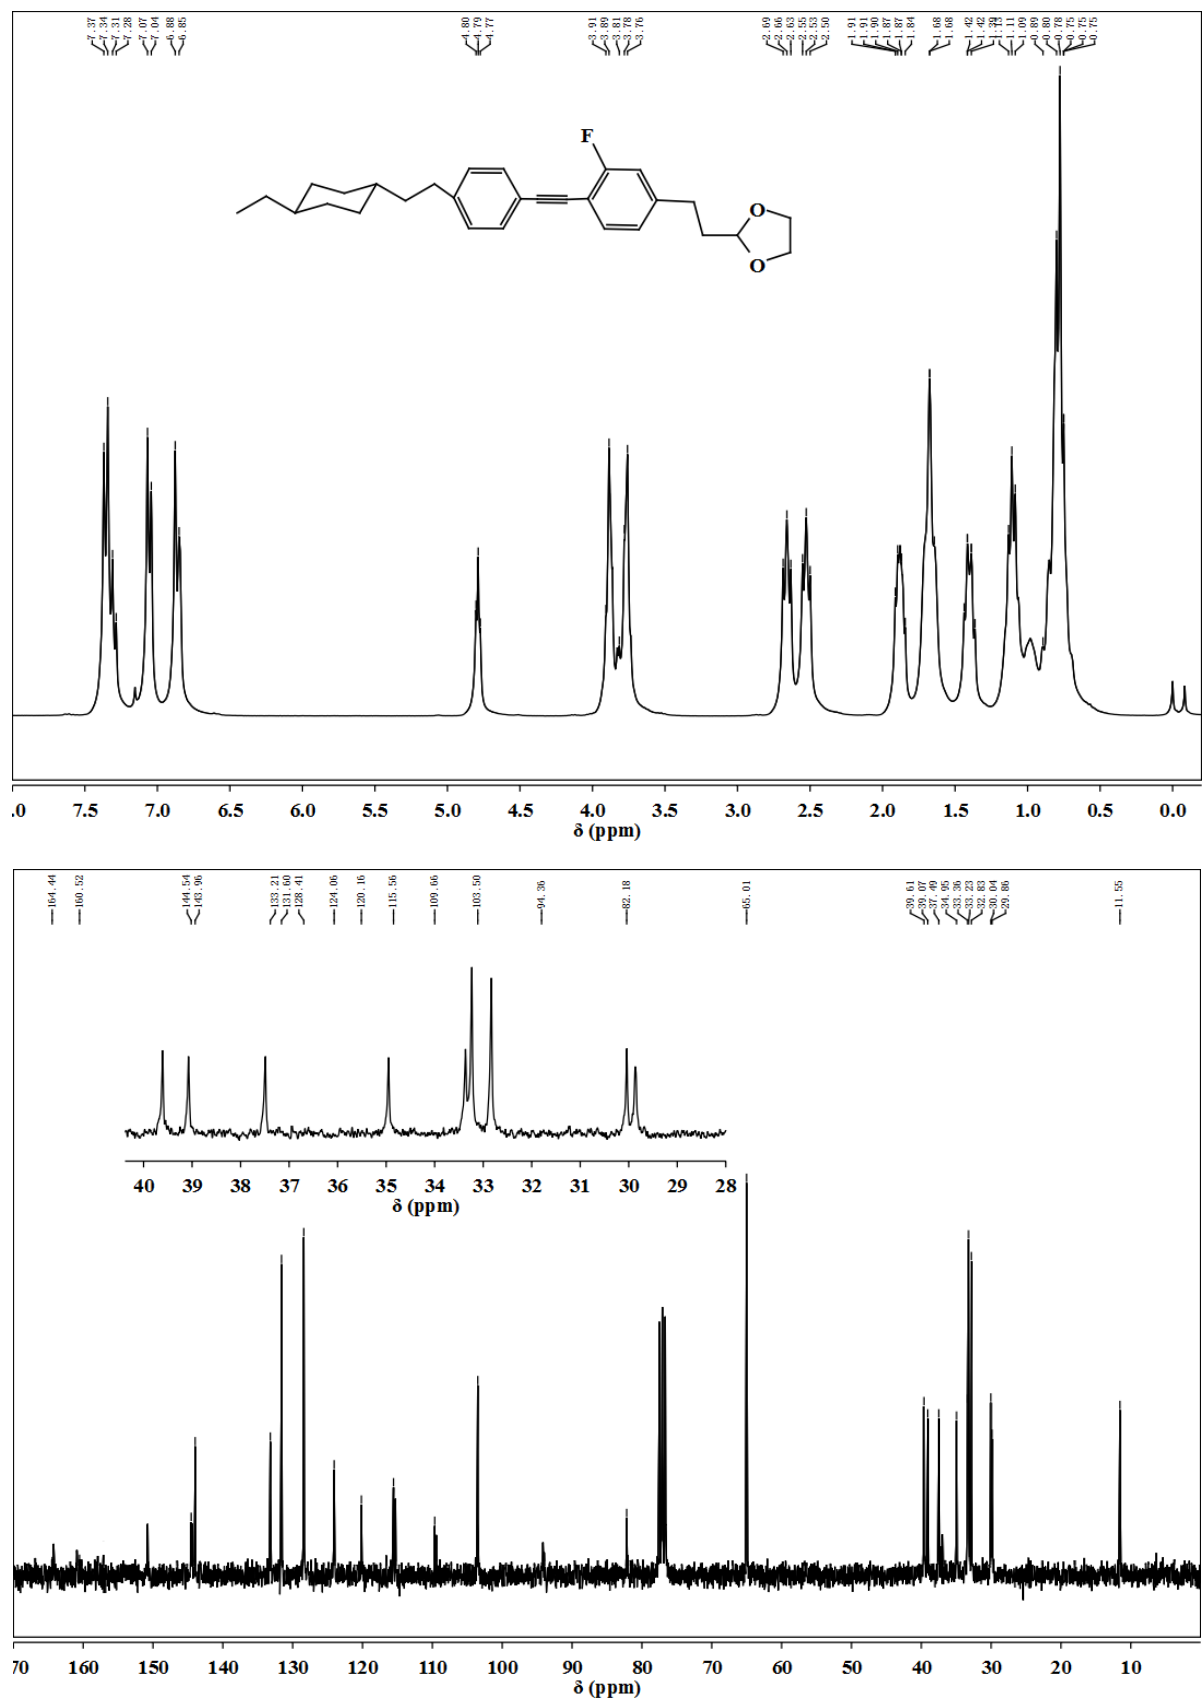

Fig. S1. <sup>1</sup>H (top) and <sup>13</sup>C (bottom) NMR spectra of 2TF2 recorded in CDCl<sub>3</sub>.

**2TF2**: The yield was 48% of white crystals.

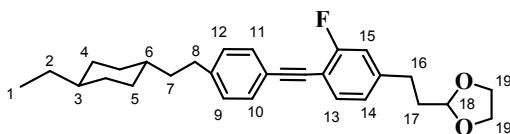

$^1\text{H NMR}$  (300 MHz,  $\text{CDCl}_3$ )  $\delta$  (ppm):  $\text{H}_{(10, 11, 13)}$  7.33 (dd,  $J = 17.7, 7.8$  Hz, 3H),  $\text{H}_{(9, 12)}$  7.05 (d,  $J = 7.9$  Hz, 2H),  $\text{H}_{(14, 15)}$  6.86 (d,  $J = 8.0$  Hz, 2H),  $\text{H}_{18}$  4.86 – 4.71 (m, 1H),  $\text{H}_{19}$  3.99 – 3.62 (m, 4H),  $\text{H}_{(8, 16)}$  2.78 – 2.42 (m, 4H),  $\text{H}_{17}$  1.99 – 1.80 (m, 2H),  $\text{H}_{(4e, 5e)}$  1.77 – 1.53 (m, 4H),  $\text{H}_7$  1.48 – 1.29 (m, 2H),  $\text{H}_{(2, 3, 6)}$  1.21 – 0.95 (m, 4H),  $\text{H}_{(1, 4a, 5a)}$  0.89 – 0.67 (m, 7H).

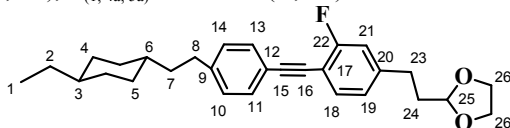

$^{13}\text{C NMR}$  (75 MHz,  $\text{CDCl}_3$ )  $\delta$  (ppm):  $\text{C}_{22}$  164.4, 160.5,  $\text{C}_9$  144.5,  $\text{C}_{20}$  144.0,  $\text{C}_{18}$  133.2,  $\text{C}_{(11, 13)}$  131.6,  $\text{C}_{(10, 14)}$  128.4,  $\text{C}_{19}$  124.1,  $\text{C}_{12}$  120.2,  $\text{C}_{21}$  115.6,  $\text{C}_{17}$  109.7,  $\text{C}_{25}$  103.5,  $\text{C}_{16}$  94.4,  $\text{C}_{15}$  82.2,  $\text{C}_{26}$  65.0,  $\text{C}_6$  39.6,  $\text{C}_3$  39.1,  $\text{C}_8$  37.5,  $\text{C}_{24}$  35.0,  $\text{C}_4$  33.3,  $\text{C}_5$  33.3,  $\text{C}_7$  32.8,  $\text{C}_{23}$  30.0,  $\text{C}_2$  30.0,  $\text{C}_1$  11.6.

EI-MS  $m/z$  (rel. int.): 434( $\text{M}^+$ , 26), 372(15), 309(18), 207(100), 100(73), 73(78).

IR (KBr, pellet,  $\text{cm}^{-1}$ ): 2955, 2912, 2848, 2205, 1907, 1605, 1515, 1438, 1217, 1130, 1038, 886, 812.

Elemental analysis: Calc. for  $\text{C}_{29}\text{H}_{35}\text{FO}_2$ : C 80.15, H 8.12; Found: C 79.92, H 8.21.

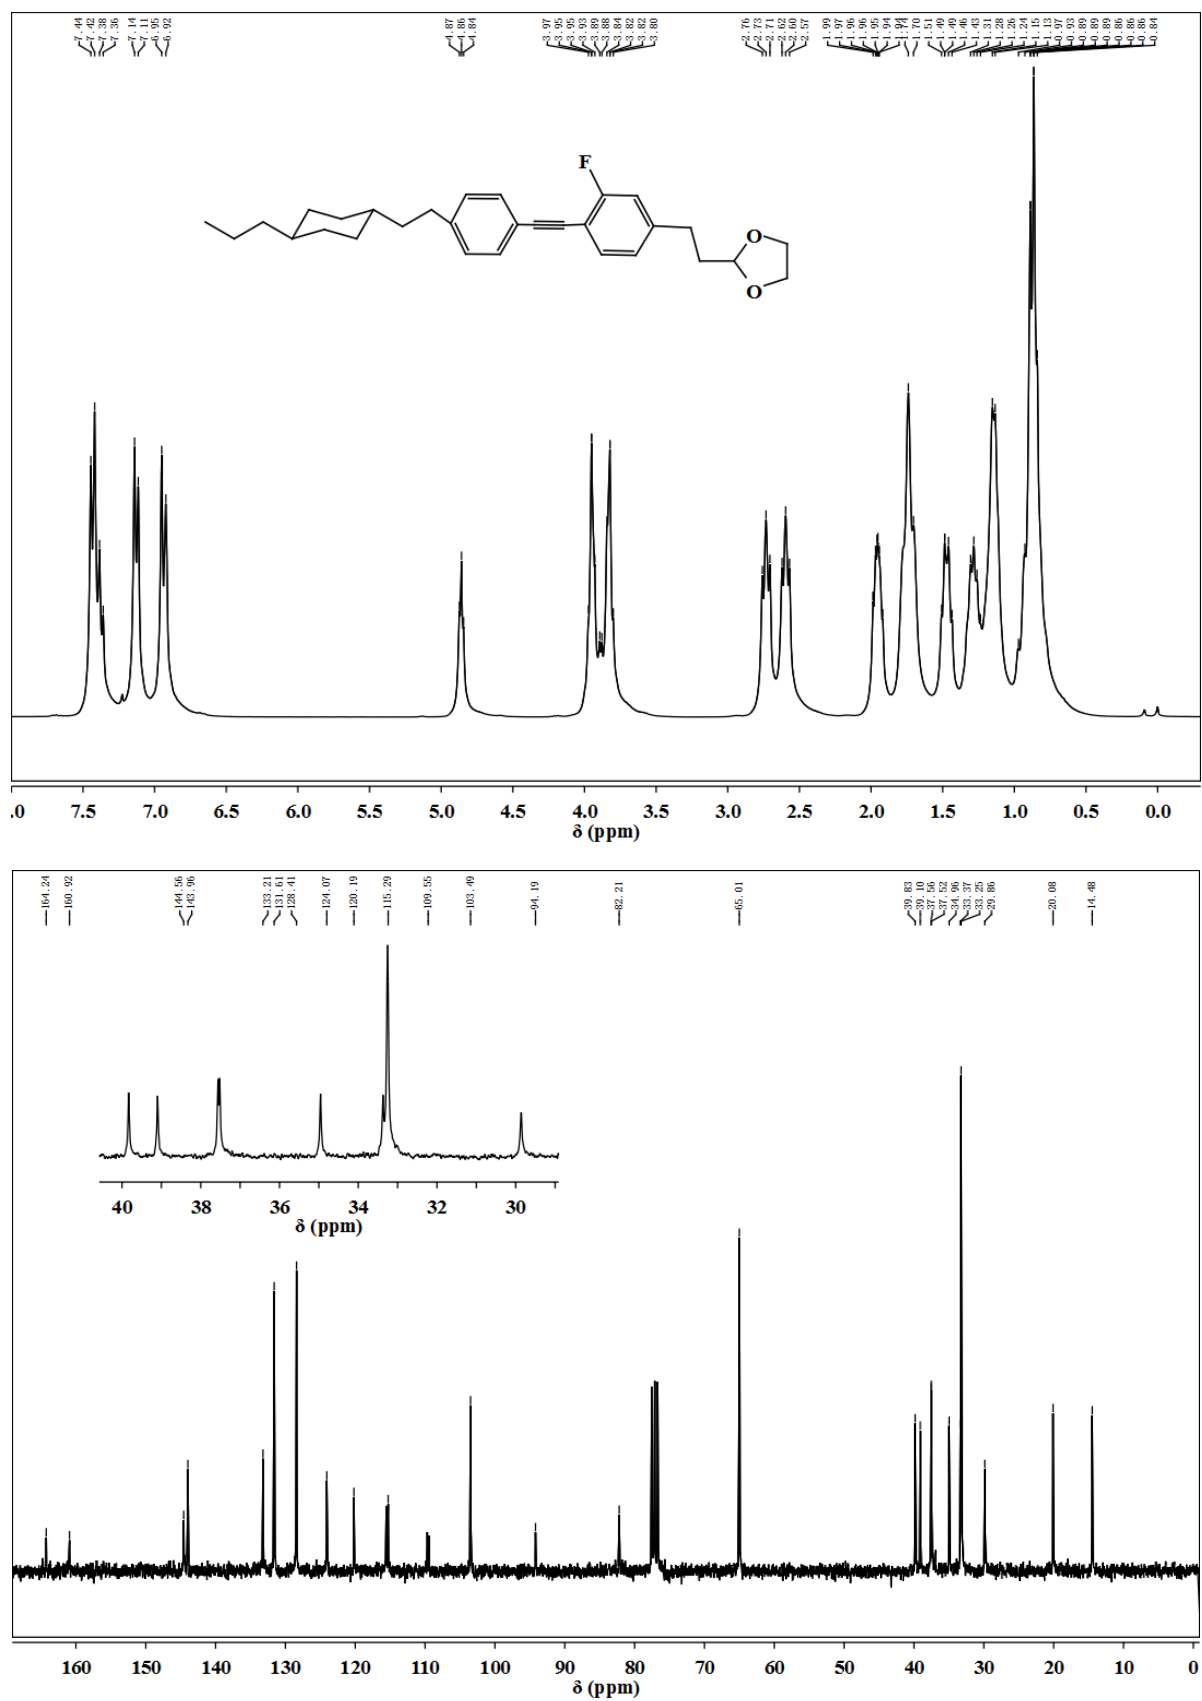

Fig. S2. <sup>1</sup>H (top) and <sup>13</sup>C (bottom) NMR spectra of 3TF2 recorded in CDCl<sub>3</sub>.

**3TF2**: The yield was 50% of white crystals.

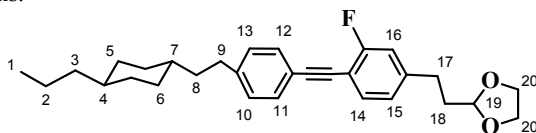

$^1\text{H}$  NMR (300 MHz,  $\text{CDCl}_3$ )  $\delta$  (ppm):  $\text{H}_{(11, 12, 14)}$  7.40 (dd,  $J = 18.0, 7.8$  Hz, 3H),  $\text{H}_{(10, 13)}$  7.13 (d,  $J = 7.8$  Hz, 2H),  $\text{H}_{(15, 16)}$  6.94 (d,  $J = 8.6$  Hz, 2H),  $\text{H}_{19}$  5.04 – 4.59 (m, 1H),  $\text{H}_{20}$  4.04 – 3.72 (m, 4H),  $\text{H}_{(9, 17)}$  2.86 – 2.43 (m, 4H),  $\text{H}_{18}$  2.09 – 1.87 (m, 2H),  $\text{H}_{(5e, 6e)}$  1.84 – 1.60 (m, 4H),  $\text{H}_8$  1.56 – 1.42 (m, 2H),  $\text{H}_{(2, 3, 4, 7)}$  1.36 – 1.08 (m, 6H),  $\text{H}_{(1, 5a, 6a)}$  0.95 – 0.76 (m, 7H).

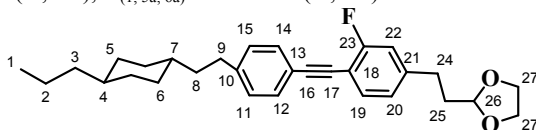

$^{13}\text{C}$  NMR (75 MHz,  $\text{CDCl}_3$ )  $\delta$  (ppm):  $\text{C}_{23}$  164.2, 160.9,  $\text{C}_{10}$  144.6,  $\text{C}_{21}$  144.0,  $\text{C}_{19}$  133.2,  $\text{C}_{(12, 14)}$  131.6,  $\text{C}_{(11, 15)}$  128.4,  $\text{C}_{20}$  124.1,  $\text{C}_{13}$  120.2,  $\text{C}_{22}$  115.3,  $\text{C}_{18}$  109.6,  $\text{C}_{26}$  103.5,  $\text{C}_{17}$  94.2,  $\text{C}_{16}$  82.2,  $\text{C}_{27}$  65.0,  $\text{C}_7$  39.8,  $\text{C}_4$  39.1,  $\text{C}_9$  37.5,  $\text{C}_3$  37.5,  $\text{C}_{25}$  35.0,  $\text{C}_5$  33.3,  $\text{C}_6$  33.3,  $\text{C}_8$  33.3,  $\text{C}_{24}$  29.9,  $\text{C}_2$  20.1,  $\text{C}_1$  14.5.

EI-MS  $m/z$  (rel. int.): 448( $\text{M}^+$ , 46), 309(28), 222(28), 207(40), 100(100).

IR (KBr, pellet,  $\text{cm}^{-1}$ ): 2958, 2906, 2848, 2211, 1903, 1613, 1517, 1440, 1221, 1131, 1042, 887, 816.

Elemental analysis: Calc. for  $\text{C}_{30}\text{H}_{37}\text{FO}_2$ : C 80.32, H 8.31; Found: C 80.26, H 8.52.

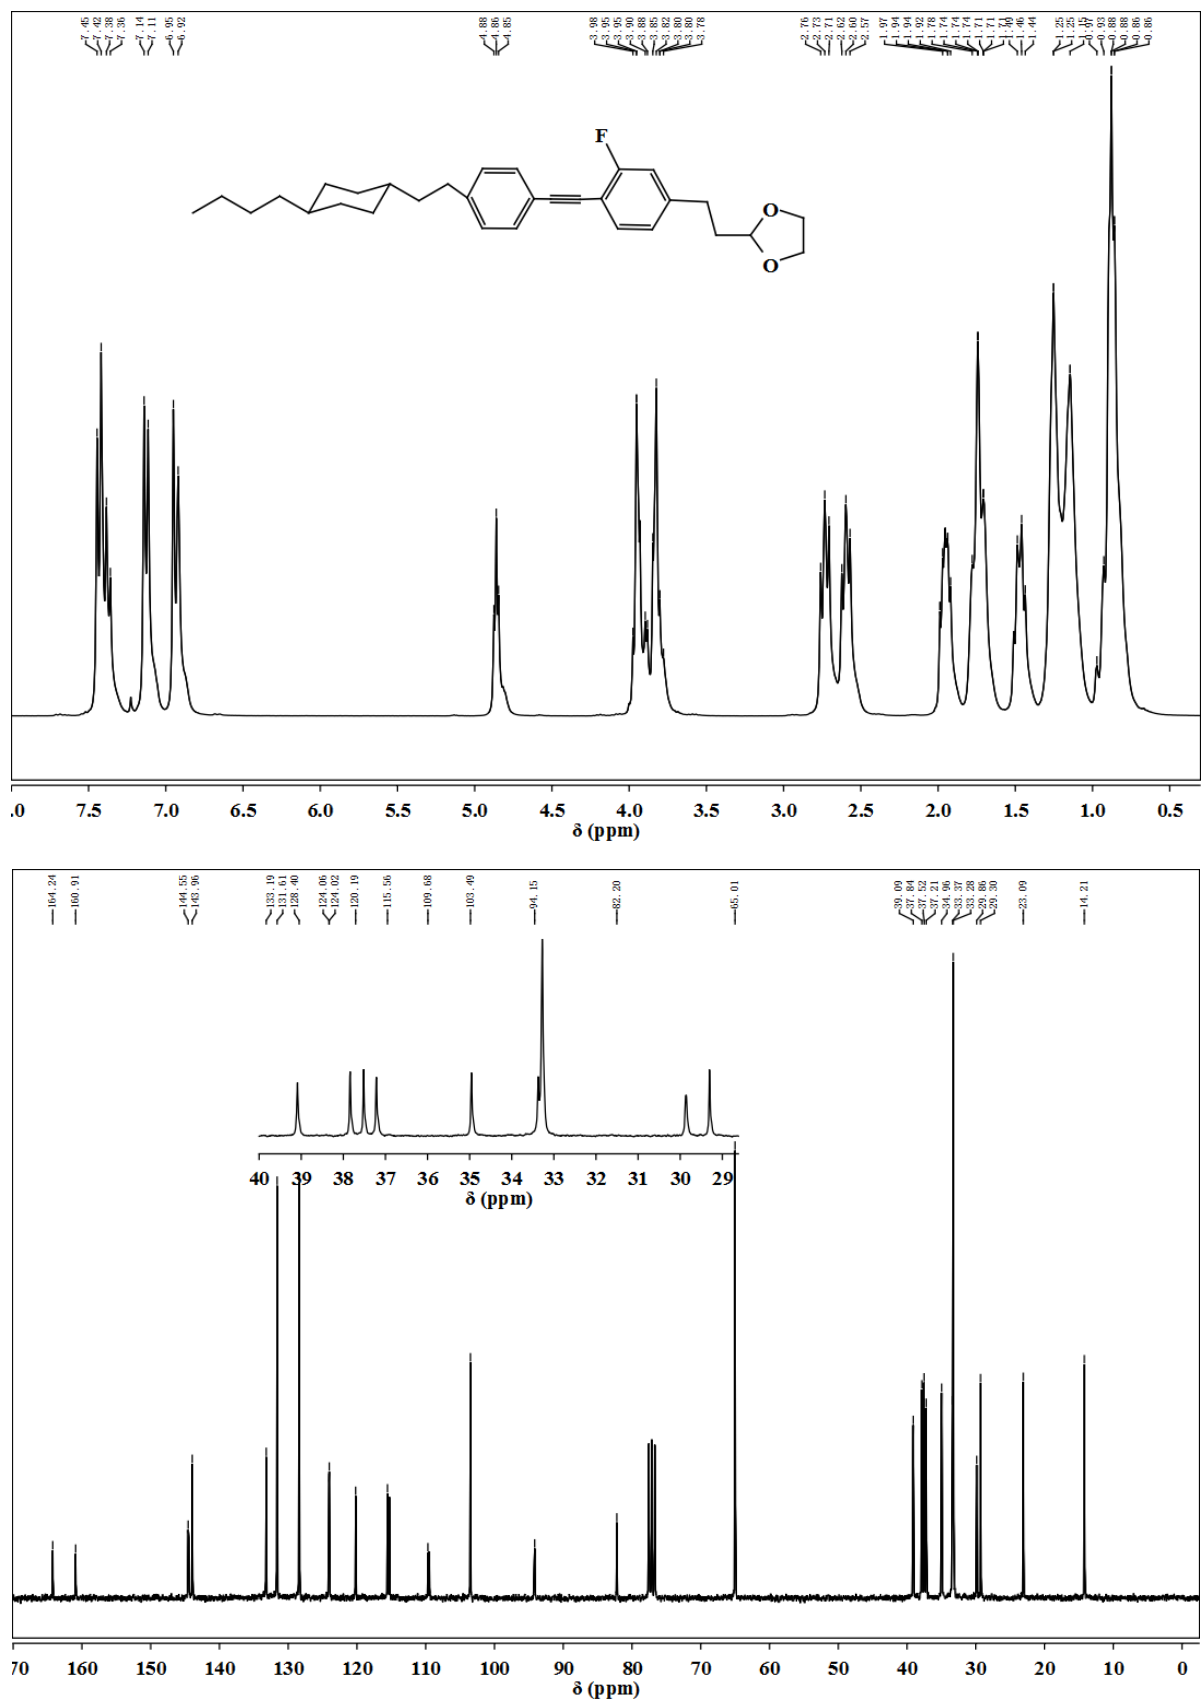

Fig. S3. <sup>1</sup>H (top) and <sup>13</sup>C (bottom) NMR spectra of 4TF2 recorded in CDCl<sub>3</sub>.

**4TF2**: The yield was 45% of white crystals.

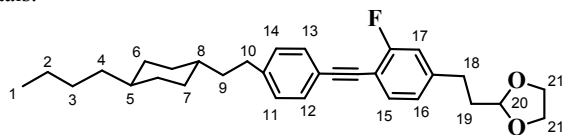

$^1\text{H NMR}$  (300 MHz,  $\text{CDCl}_3$ )  $\delta$  (ppm):  $\text{H}_{(12, 13, 15)}$  7.40 (dd,  $J = 18.1, 7.8$  Hz, 3H),  $\text{H}_{(11, 14)}$  7.13 (d,  $J = 8.0$  Hz, 2H),  $\text{H}_{(16, 17)}$  6.94 (d,  $J = 9.2$  Hz, 2H),  $\text{H}_{20}$  4.93 – 4.77 (m, 1H),  $\text{H}_{21}$  4.00 – 3.72 (m, 4H),  $\text{H}_{(10, 18)}$  2.78 – 2.49 (m, 4H),  $\text{H}_{19}$  2.03 – 1.86 (m, 2H),  $\text{H}_{(6e, 7e)}$  1.83 – 1.60 (m, 4H),  $\text{H}_9$  1.54 – 1.36 (m, 2H),  $\text{H}_{(2, 3, 4, 5, 8)}$  1.34 – 1.04 (m, 8H),  $\text{H}_{(1, 6a, 7a)}$  0.97 – 0.73 (m, 7H).

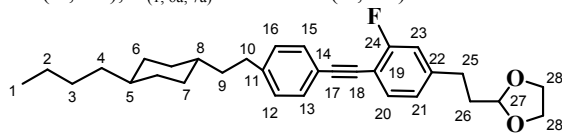

$^{13}\text{C NMR}$  (75 MHz,  $\text{CDCl}_3$ )  $\delta$  (ppm):  $\text{C}_{24}$  164.2, 160.9,  $\text{C}_{11}$  144.6,  $\text{C}_{22}$  144.0,  $\text{C}_{20}$  133.2,  $\text{C}_{(13, 15)}$  131.6,  $\text{C}_{(12, 16)}$  128.4,  $\text{C}_{21}$  124.0,  $\text{C}_{14}$  120.2,  $\text{C}_{23}$  115.6,  $\text{C}_{19}$  109.7,  $\text{C}_{27}$  103.5,  $\text{C}_{18}$  94.2,  $\text{C}_{17}$  82.2,  $\text{C}_{28}$  65.0,  $\text{C}_8$  39.1,  $\text{C}_5$  37.8,  $\text{C}_{10}$  37.5,  $\text{C}_4$  37.2,  $\text{C}_{26}$  35.0,  $\text{C}_6$  33.3,  $\text{C}_7$  33.3,  $\text{C}_9$  33.3,  $\text{C}_{25}$  29.9,  $\text{C}_3$  29.3,  $\text{C}_2$  23.1,  $\text{C}_1$  14.2.

EI-MS  $m/z$  (rel. int.): 462( $\text{M}^+$ , 50), 309(38), 235(30), 100(100), 73(70).

IR (KBr, pellet,  $\text{cm}^{-1}$ ): 2962, 2916, 2848, 2208, 1913, 1617, 1517, 1436, 1217, 1135, 1048, 880, 812.

Elemental analysis: Calc. for  $\text{C}_{31}\text{H}_{39}\text{FO}_2$ : C 80.48, H 8.50; Found: C 80.28, H 8.66.

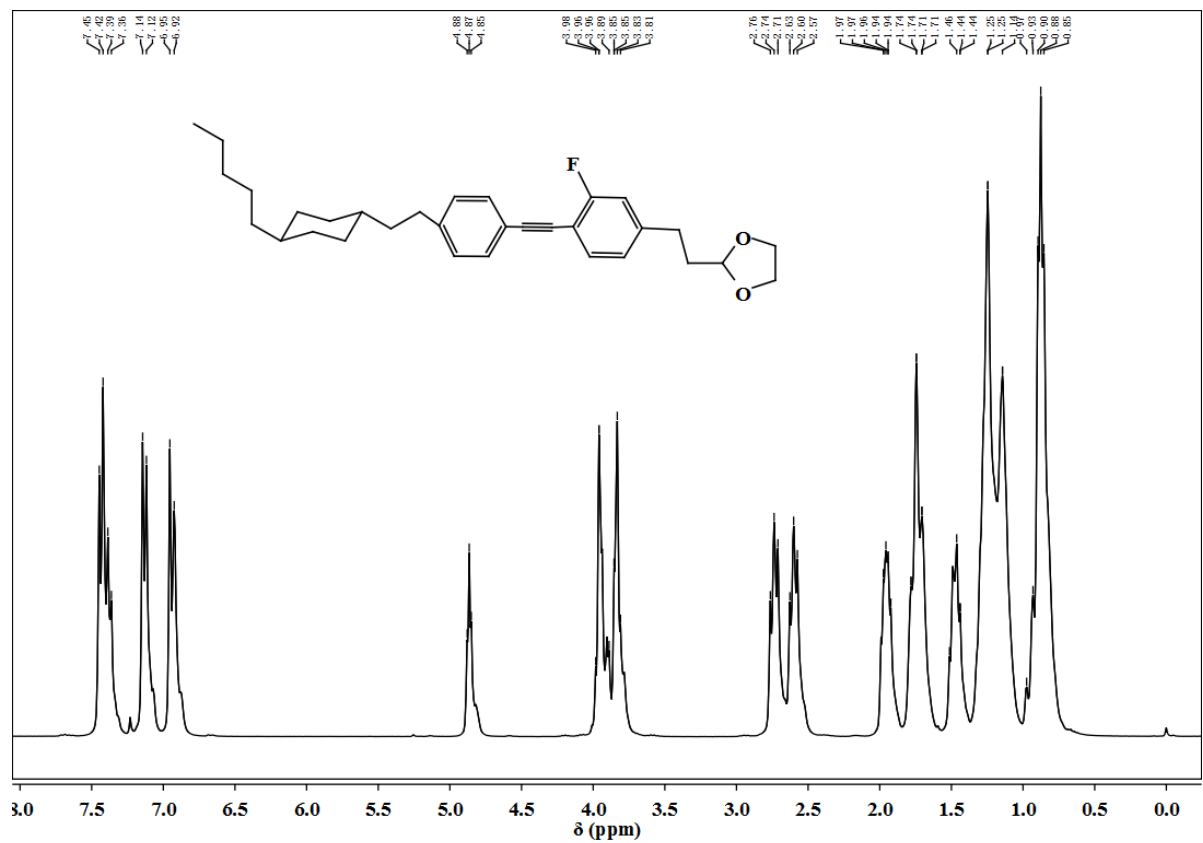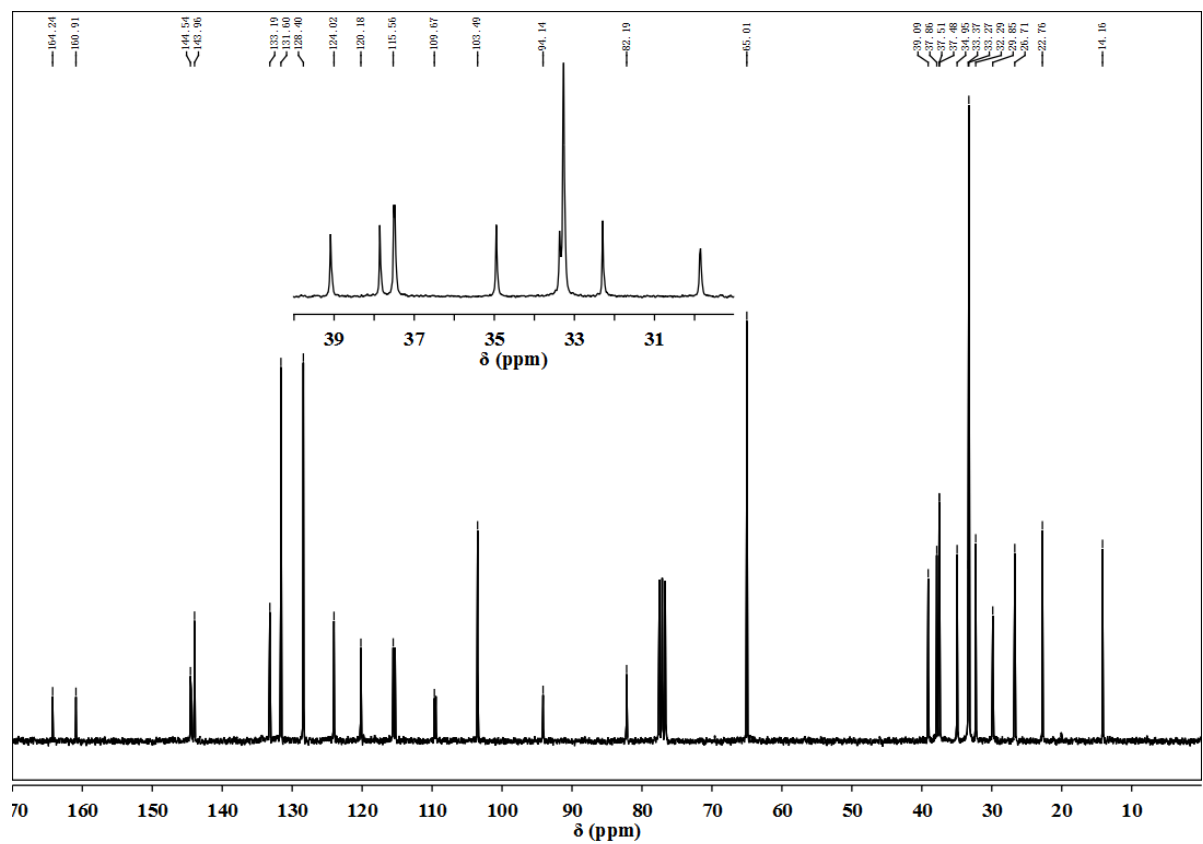

Fig. S4. <sup>1</sup>H (top) and <sup>13</sup>C (bottom) NMR spectra of 5TF2 recorded in CDCl<sub>3</sub>.



**5TF2**: The yield was 52% of white crystals.

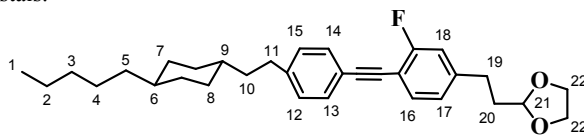

$^1\text{H NMR}$  (300 MHz,  $\text{CDCl}_3$ )  $\delta$  (ppm):  $\text{H}_{(13, 14, 16)}$  7.40 (dd,  $J = 17.7, 7.7$  Hz, 3H),  $\text{H}_{(12, 15)}$  7.13 (d,  $J = 7.9$  Hz, 2H),  $\text{H}_{(17, 18)}$  6.94 (d,  $J = 9.0$  Hz, 2H),  $\text{H}_{21}$  4.92 – 4.76 (m, 1H),  $\text{H}_{22}$  4.01 – 3.71 (m, 4H),  $\text{H}_{(11, 19)}$  2.81 – 2.49 (m, 4H),  $\text{H}_{20}$  2.03 – 1.85 (m, 2H),  $\text{H}_{(7e, 8e)}$  1.82 – 1.59 (m, 4H),  $\text{H}_{10}$  1.55 – 1.37 (m, 2H),  $\text{H}_{(2, 3, 4, 5, 6, 9)}$  1.35 – 1.02 (m, 10H),  $\text{H}_{(1, 7a, 8a)}$  1.00 – 0.70 (m, 7H).

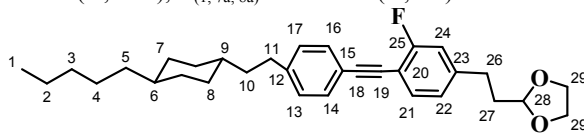

$^{13}\text{C NMR}$  (75 MHz,  $\text{CDCl}_3$ )  $\delta$  (ppm):  $\text{C}_{25}$  164.2, 160.9,  $\text{C}_{12}$  144.5,  $\text{C}_{23}$  144.0,  $\text{C}_{21}$  133.2,  $\text{C}_{(14, 16)}$  131.6,  $\text{C}_{(13, 17)}$  128.4,  $\text{C}_{22}$  124.0,  $\text{C}_{15}$  120.2,  $\text{C}_{24}$  115.6,  $\text{C}_{20}$  109.7,  $\text{C}_{28}$  103.5,  $\text{C}_{19}$  94.1,  $\text{C}_{18}$  82.2,  $\text{C}_{29}$  65.0,  $\text{C}_9$  39.1,  $\text{C}_6$  37.9,  $\text{C}_{11}$  37.5,  $\text{C}_5$  37.5,  $\text{C}_{27}$  35.0,  $\text{C}_7$  33.3,  $\text{C}_8$  33.3,  $\text{C}_{10}$  33.3,  $\text{C}_3$  32.3,  $\text{C}_{26}$  29.9,  $\text{C}_4$  26.7,  $\text{C}_2$  22.8,  $\text{C}_1$  14.2.

EI-MS  $m/z$  (rel. int.): 476( $\text{M}^+$ , 55), 309(40), 235(28), 100(100), 73(62).

IR (KBr, pellet,  $\text{cm}^{-1}$ ): 2960, 2909, 2848, 2207, 1903, 1613, 1513, 1440, 1217, 1128, 1049, 886, 816.

Elemental analysis: Calc. for  $\text{C}_{32}\text{H}_{41}\text{FO}_2$ : C 80.63, H 8.67; Found: C 80.33, H 8.71.

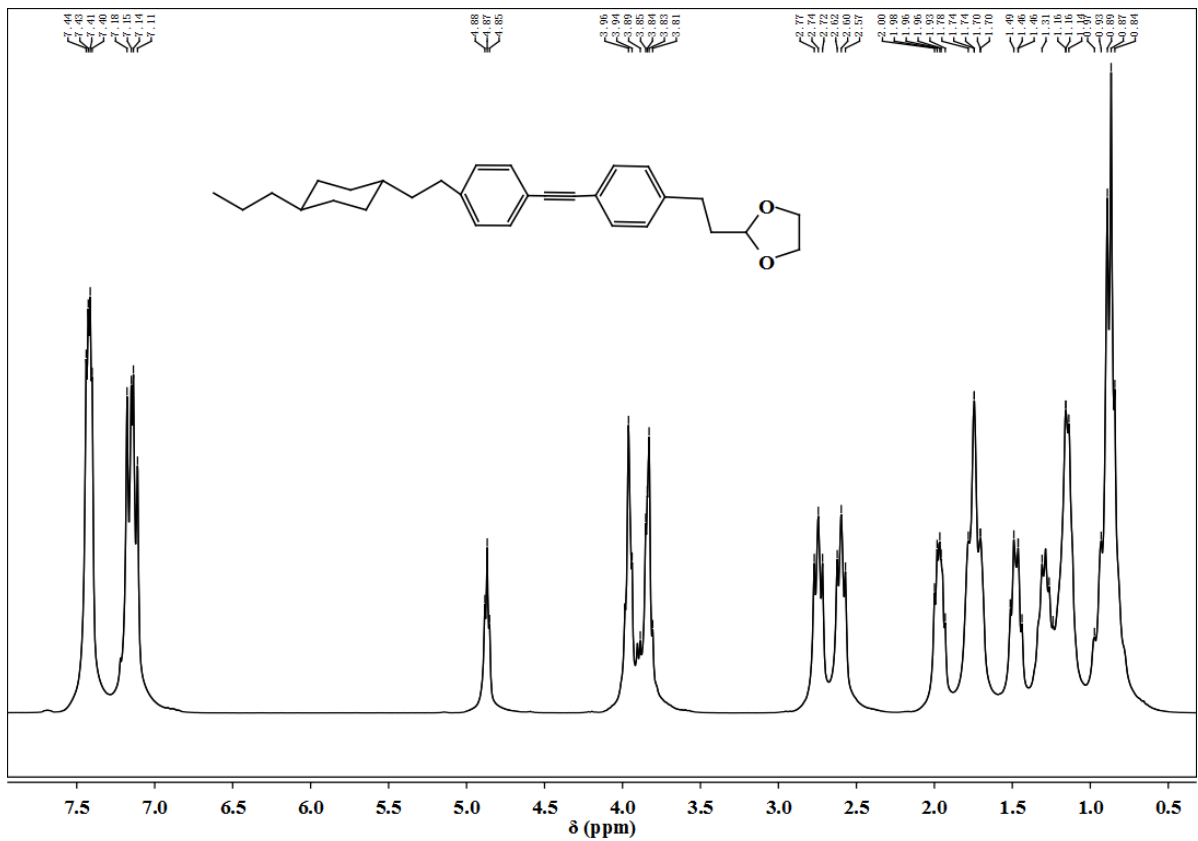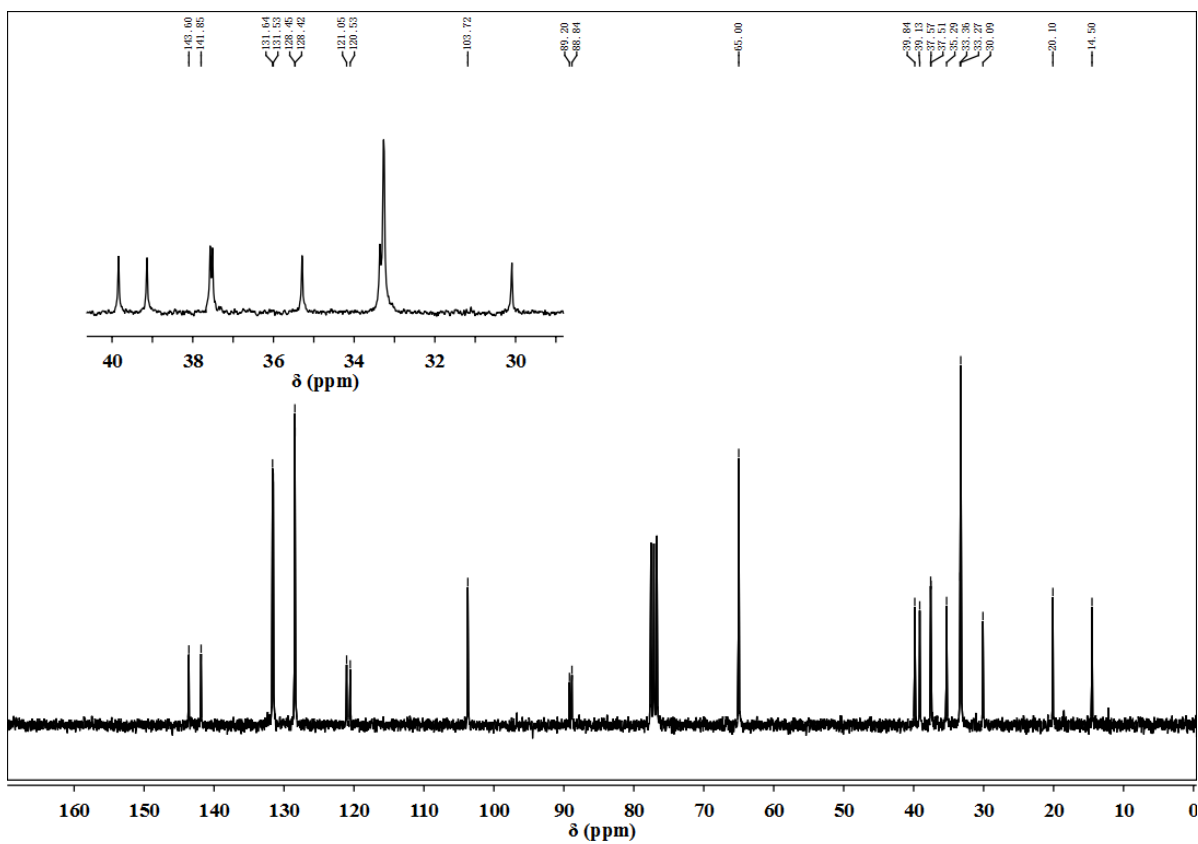

Fig. S5. <sup>1</sup>H (top) and <sup>13</sup>C (bottom) NMR spectra of 3T recorded in CDCl<sub>3</sub>.

**3T**: The yield was 55% of white crystals.

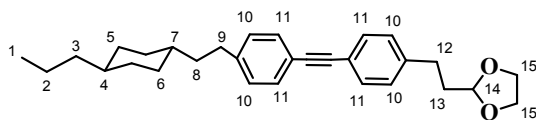

$^1\text{H NMR}$  (300 MHz,  $\text{CDCl}_3$ )  $\delta$  (ppm):  $\text{H}_{11}$  7.42 (dd,  $J = 7.7, 3.9$  Hz, 4H),  $\text{H}_{10}$  7.14 (dd,  $J = 12.1, 8.1$  Hz, 4H),  $\text{H}_{14}$  5.01 – 4.79 (m, 1H),  $\text{H}_{15}$  4.09 – 3.75 (m, 4H),  $\text{H}_{12}$  2.87 – 2.67 (m, 2H),  $\text{H}_9$  2.67 – 2.47 (m, 2H),  $\text{H}_{13}$  2.08 – 1.89 (m, 2H),  $\text{H}_{(5e, 6e)}$  1.84 – 1.62 (m, 4H),  $\text{H}_8$  1.55 – 1.38 (m, 2H),  $\text{H}_{(2, 3, 4, 7)}$  1.36 – 1.08 (m, 6H),  $\text{H}_{(1, 5a, 6a)}$  0.99 – 0.79 (m, 7H).

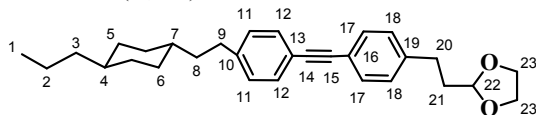

$^{13}\text{C NMR}$  (75 MHz,  $\text{CDCl}_3$ )  $\delta$  (ppm):  $\text{C}_{10}$  143.6,  $\text{C}_{19}$  141.9,  $\text{C}_{17}$  131.6,  $\text{C}_{12}$  131.5,  $\text{C}_{11}$  128.4,  $\text{C}_{18}$  128.4,  $\text{C}_{16}$  121.1,  $\text{C}_{13}$  120.5,  $\text{C}_{22}$  103.7,  $\text{C}_{15}$  89.2,  $\text{C}_{14}$  88.8,  $\text{C}_{23}$  65.0,  $\text{C}_7$  39.8,  $\text{C}_4$  39.1,  $\text{C}_9$  37.5,  $\text{C}_3$  37.5,  $\text{C}_{21}$  35.3,  $\text{C}_5$  33.3,  $\text{C}_6$  33.3,  $\text{C}_8$  33.3,  $\text{C}_{20}$  30.1,  $\text{C}_2$  20.1,  $\text{C}_1$  14.5.

EI-MS  $m/z$  (rel. int.): 430( $\text{M}^+$ , 57), 217(28), 204(30), 100(100), 73(47).

IR (KBr, pellet,  $\text{cm}^{-1}$ ): 2951, 2912, 2848, 2115, 1903, 1607, 1510, 1446, 1408, 1131, 1028, 881, 811.

Elemental analysis: Calc. for  $\text{C}_{30}\text{H}_{38}\text{O}_2$ : C 83.67, H 8.89; Found: C 83.89, H 9.12.

The characterized data of compounds **nBF1** and **nBF2** are listed below:

**2BF1**: The yield was 60% of white crystals.  $^1\text{H}$  NMR (300 MHz,  $\text{CDCl}_3$ )  $\delta$  (ppm): 7.46 (d,  $J = 7.1$  Hz, 2H), 7.29 (m, 3H), 7.00 - 6.89 (m, 2H), 4.94 - 4.91 (m, 1H), 4.07 - 3.92 (m, 2H), 3.90 - 3.74 (m, 2H), 2.87 - 2.72 (m, 2H), 2.68 - 2.50 (m, 2H), 2.09 - 1.90 (m, 2H), 1.85 - 1.65 (m, 4H), 1.60 - 1.40 (m, 2H), 1.32 - 1.03 (m, 4H), 0.99 - 0.71 (m, 7H).  $^{13}\text{C}$  NMR (75 MHz,  $\text{CDCl}_3$ )  $\delta$  (ppm): 161.4, 158.1, 144.7, 144.7, 140.8, 133.6, 130.3, 130.3, 129.0, 128.9, 128.5, 126.0, 125.9, 124.3, 124.3, 115.8, 115.5, 103.9, 65.0, 39.6, 39.0, 37.5, 35.5, 33.3, 33.3, 32.8, 30.0, 29.9, 11.6. EI-MS  $m/z$  (rel. int.): 410( $\text{M}^+$ , 12), 348(19), 198(19), 100(100), 73(60). IR (KBr, pellet,  $\text{cm}^{-1}$ ): 2964, 2919, 2848, 1916, 1568, 1498, 1446, 1409, 1125, 1035, 861, 816.

**3BF1**: The yield was 62% of white crystals.  $^1\text{H}$  NMR (300 MHz,  $\text{CDCl}_3$ )  $\delta$  (ppm): 7.46 (d,  $J = 7.5$  Hz, 2H), 7.30 (m, 3H), 7.00 - 6.87 (m, 2H), 4.94 - 4.91 (m, 1H), 4.02-3.99 (m, 2H), 3.91-3.86 (m, 2H), 2.80-2.77 (m, 2H), 2.64-2.61 (m, 2H), 2.04-2.00 (m, 2H), 1.76-1.73 (m, 4H), 1.57-1.51 (m, 2H), 1.30-1.28 (m, 2H), 1.17-1.13 (m, 4H), 0.92-0.85 (m, 7H).  $^{13}\text{C}$  NMR (75MHz,  $\text{CDCl}_3$ )  $\delta$  (ppm): 161.3, 158.0, 144.7, 144.7, 140.8, 133.5, 130.3, 130.3, 129.0, 128.9, 128.5, 126.0, 125.9, 124.3, 124.3, 115.9, 115.6, 103.8, 65.0, 39.8, 39.0, 37.5, 37.5, 35.4, 33.2, 33.2, 32.8, 29.9, 20.1, 14.6. EI-MS  $m/z$  (rel. int.): 424( $\text{M}^+$ , 8), 362(16), 198(20), 100(100), 73(61). IR (KBr, pellet,  $\text{cm}^{-1}$ ): 2962, 2912, 2848, 1912, 1564, 1496, 1440, 1412, 1122, 1031, 866, 818.

**4BF1**: The yield was 58% of white crystals.  $^1\text{H}$  NMR (300 MHz,  $\text{CDCl}_3$ )  $\delta$  (ppm): 7.38 (d,  $J = 6.9$  Hz, 2H), 7.20 (m, 3H), 6.98 - 6.82 (m, 2H), 4.89 - 4.81 (m, 1H), 3.98 - 3.87 (m, 2H), 3.85 - 3.75 (m, 2H), 2.78 - 2.64 (m, 2H), 2.61 - 2.51 (m, 2H), 2.04 - 1.87 (m, 2H), 1.81 - 1.61 (m, 4H), 1.52 - 1.36 (m, 2H), 1.24 - 1.06 (m, 8H), 0.91 - 0.74 (m, 7H).  $^{13}\text{C}$  NMR (75 MHz,  $\text{CDCl}_3$ )  $\delta$  (ppm): 161.3, 158.1, 144.7, 144.7, 140.8, 133.6, 130.3, 130.3, 128.9, 128.9, 128.5, 126.0, 125.8, 124.3, 124.3, 115.9, 115.6, 103.8, 65.0, 39.0, 37.8, 37.5, 37.5, 37.2, 35.4, 33.3, 33.3, 32.9, 29.9, 29.3, 23.1, 14.2. EI-MS  $m/z$  (rel. int.): 438( $\text{M}^+$ , 7), 376(22), 198(23), 100(100), 73(66). IR (KBr, pellet,  $\text{cm}^{-1}$ ): 2958, 2914, 2846, 1910, 1562, 1494, 1436, 1406, 1117, 1028, 858, 807.

**5BF1**: The yield was 63% of white crystals.  $^1\text{H}$  NMR (300 MHz,  $\text{CDCl}_3$ )  $\delta$  (ppm): 7.45 (d,  $J = 7.0$  Hz, 2H), 7.28 (m, 3H), 6.98 - 6.92 (m, 2H), 4.95 - 4.84 (m, 1H), 4.02 - 3.93 (m, 2H), 3.87 - 3.77 (m, 2H), 2.88 - 2.72 (m, 2H), 2.68 - 2.54 (m, 2H), 2.09 - 1.93 (m, 2H), 1.88 - 1.66 (m, 4H), 1.59 - 1.40 (m, 2H), 1.43 - 1.06 (m, 10H), 1.03 - 0.77 (m, 7H).  $^{13}\text{C}$  NMR (75 MHz,  $\text{CDCl}_3$ )  $\delta$  (ppm): 161.4, 158.1, 144.7, 144.7, 140.9, 133.6, 130.3, 130.3, 129.0, 129.0, 128.5, 126.0, 125.9, 124.3, 124.3, 116.0, 115.7, 103.9, 65.0, 39.1, 37.9, 37.5, 37.5, 35.5, 33.3, 33.3, 32.9, 32.3, 29.9, 26.8, 22.8, 14.2. EI-MS  $m/z$  (rel. int.): 452( $\text{M}^+$ , 8), 390(29), 185(19), 100(100), 73(58). IR (KBr, pellet,  $\text{cm}^{-1}$ ): 2951, 2910, 2848, 1912, 1558, 1488, 1442, 1409, 1115, 1025, 858, 809.

**2BF2**: The yield was 58% of white crystals.  $^1\text{H}$  NMR (300 MHz,  $\text{CDCl}_3$ )  $\delta$  (ppm): 7.33 (d,  $J = 7.0$  Hz, 2H), 7.21 (t,  $J = 8.1$  Hz, 1H), 7.11 (m, 2H), 6.92 - 6.86 (m, 2H), 4.85 - 4.71 (m, 1H), 3.91 - 3.78 (m, 2H), 3.75 - 3.63 (m, 2H), 2.72 - 2.60 (m, 2H), 2.57 - 2.44 (m, 2H), 1.95 - 1.81 (m, 2H), 1.78 - 1.56 (m, 4H), 1.50 - 1.35 (m, 2H), 1.20 - 0.95 (m, 4H), 0.87 - 0.67 (m, 7H).  $^{13}\text{C}$  NMR (75 MHz,  $\text{CDCl}_3$ )  $\delta$  (ppm): 161.4, 158.2, 143.0, 142.6, 133.1, 130.5, 130.5, 128.8, 128.8, 128.5, 126.6, 126.5, 124.4, 116.1, 115.8, 103.7, 65.0, 39.7, 39.4, 37.7, 35.2, 33.3, 33.2, 32.9, 30.1, 29.6, 11.6. EI-MS  $m/z$  (rel. int.): 410( $\text{M}^+$ , 33), 324(30), 211(34), 198(31), 100(100), 73(81). IR (KBr, pellet,  $\text{cm}^{-1}$ ): 2964, 2919, 2848, 1916, 1626, 1492, 1440, 1395, 1273, 1131, 1022, 887, 810.

**3BF2**: The yield was 62% of white crystals.  $^1\text{H}$  NMR (600 MHz,  $\text{CDCl}_3$ )  $\delta$  (ppm): 7.36 (d,  $J = 7.5$  Hz, 2H), 7.26 (t,  $J = 8.0$  Hz, 1H), 7.16 (m, 2H), 6.96 - 6.91 (m, 2H), 4.92 - 4.79 (m, 1H), 3.97 - 3.86 (m, 2H), 3.85 - 3.74 (m, 2H), 2.74 - 2.63 (m, 2H), 2.62 - 2.50 (m, 2H), 1.99 - 1.87 (m, 2H), 1.76 - 1.63 (m, 4H), 1.49 - 1.42 (m, 2H), 1.26 - 1.20 (m, 2H), 1.17 - 1.04 (m, 4H), 0.89 - 0.77 (m, 7H).  $^{13}\text{C}$  NMR (151 MHz,  $\text{CDCl}_3$ )  $\delta$  (ppm): 160.6, 158.9, 142.9, 142.6, 133.0, 130.5, 130.5, 128.8, 128.8, 128.4, 126.8, 126.6, 124.3, 116.0, 115.9, 103.7, 65.0, 39.8, 39.4, 37.5, 37.5, 35.2, 33.3, 33.3, 33.1, 29.6, 20.1, 14.5. EI-MS  $m/z$  (rel. int.): 424( $\text{M}^+$ , 23), 338(25), 211(35), 198(31), 100(100), 73(84). IR (KBr, pellet,  $\text{cm}^{-1}$ ): 2964, 2919, 2848, 1907, 1616, 1489, 1444, 1387, 1270, 1135, 1028, 891, 815.

**4BF2**: The yield was 60% of white crystals.  $^1\text{H}$  NMR (600 MHz,  $\text{CDCl}_3$ )  $\delta$  (ppm): 7.37 (d,  $J = 7.6$  Hz, 2H), 7.27 (t,  $J = 8.0$  Hz, 1H), 7.17 (m, 2H), 6.97 - 6.91 (m, 2H), 4.91 - 4.80 (m, 1H), 3.98 - 3.89 (m, 2H), 3.86 - 3.78 (m, 2H), 2.75 - 2.67 (m, 2H), 2.63 - 2.54 (m, 2H), 1.97 - 1.90 (m, 2H), 1.79 - 1.63 (m, 4H), 1.51 - 1.42 (m, 2H), 1.22 - 1.07 (m, 8H), 0.90 - 0.73 (m, 7H).  $^{13}\text{C}$  NMR (151 MHz,  $\text{CDCl}_3$ )  $\delta$  (ppm): 160.6, 159.0, 143.0, 142.6, 133.0, 130.5, 130.5, 128.8, 128.8, 128.4, 126.6, 126.5, 124.3, 116.0, 115.8, 103.7, 65.0, 39.4, 37.9, 37.5, 37.5, 37.2, 35.2, 33.3, 33.3, 33.1, 29.6, 29.3, 23.1, 14.2. EI-MS  $m/z$  (rel. int.): 438( $\text{M}^+$ , 18), 376(19), 211(34), 198(30), 100(100), 73(82). IR (KBr, pellet,  $\text{cm}^{-1}$ ): 2962, 2910, 2845, 1910, 1616, 1487, 1438, 1392, 1268, 1128, 1022, 887, 813.

**5BF2**: The yield was 61% of white crystals.  $^1\text{H}$  NMR (600 MHz,  $\text{CDCl}_3$ )  $\delta$  (ppm): 7.48 (d,  $J = 8.0$  Hz, 2H), 7.31 (t,  $J = 8.1$  Hz, 1H), 7.22 (m, 2H), 6.97 - 6.92 (m, 2H), 4.96 - 4.85 (m, 1H), 4.05 - 3.92 (m, 2H), 3.92 - 3.81 (m, 2H), 2.82 - 2.75 (m, 2H), 2.70 - 2.51 (m, 2H), 2.05 - 1.97 (m, 2H), 1.83 - 1.70 (m, 4H), 1.58 - 1.43 (m, 2H), 1.36 - 1.08 (m, 10H), 1.00 - 0.79 (m, 7H).  $^{13}\text{C}$  NMR (151 MHz,  $\text{CDCl}_3$ )  $\delta$  (ppm): 163.6, 162.0, 145.8, 142.0, 138.5, 129.6, 129.5, 128.9, 128.7, 128.4, 126.8, 126.8, 124.0, 115.2, 115.0, 103.8, 65.0, 39.4, 37.9, 37.6, 37.5, 35.4, 33.3, 33.3, 33.0, 32.3, 29.8, 26.7, 22.7, 14.1. EI-MS  $m/z$  (rel. int.): 452( $\text{M}^+$ , 20), 390(28), 211(33), 207(83), 100(100), 73(97). IR (KBr, pellet,  $\text{cm}^{-1}$ ): 2958, 2919, 2848, 1912, 1622, 1489, 1444, 1387, 1273, 1135, 1017, 890, 810.

### 3. Table S1 and Fig. S6

**Table S1.** Types of phase transition, temperatures and corresponding enthalpies obtained by POM and DSC for compounds **nTF2**, **3T**, **nBF1** and **nBF2**.<sup>a</sup>

| Compounds   | Transition temperature, °C (enthalpy change, kJ mol <sup>-1</sup> )      |                                  |
|-------------|--------------------------------------------------------------------------|----------------------------------|
|             | Heating process                                                          | Cooling process                  |
| <b>2TF2</b> | Cr <sub>1</sub> 73.2 (17.8) Cr <sub>2</sub> 101.7 (20.1) N 124.9 (1.3) I | I 122.1 (-1.4) N 88.6 (-19.8) Cr |
| <b>3TF2</b> | Cr <sub>1</sub> 83.3 (4.4) Cr <sub>2</sub> 117.3 (20.0) N 150.6 (1.5) I  | I 146.9 (-1.7) N 94.4 (-19.6) Cr |
| <b>4TF2</b> | Cr 101.7 (21.9) N 142.8 (1.4) I                                          | I 139.7 (-1.6) N 83.5 (-20.4) Cr |
| <b>5TF2</b> | Cr <sub>1</sub> 83.7 (3.3) Cr <sub>2</sub> 115.7 (23.4) N 147.3 (1.5) I  | I 143.8 (-1.6) N 99.0 (-15.0) Cr |
| <b>3T</b>   | Cr 130.8 (15.8) N 160.7 (1.1) I                                          | I 155.5 (-0.9) N 108.0 (-9.4) Cr |
| <b>2BF1</b> | Cr 79.0 (0.5) I                                                          | I 76.0 (-0.6) Cr                 |
| <b>3BF1</b> | Cr 70.2 (14.1) N 111.8 (1.0) I                                           | I 108.3 (-1.3) N 56.4 (-11.7) Cr |
| <b>4BF1</b> | Cr 104.3 (0.8) I                                                         | I 100.8 (-0.7) Cr                |
| <b>5BF1</b> | Cr 68.1 (32.4) N 112.8 (1.1) I                                           | I 110.3 (-1.4) N 46.0 (-14.6) Cr |
| <b>2BF2</b> | Cr 71.0 (46.0) I                                                         | I 71.4 (-1.3) Cr                 |
| <b>3BF2</b> | Cr 82.5 (18.5) N 113.9 (1.5) I                                           | I 110.5 (-1.7) N 58.3 (-17.1) Cr |
| <b>4BF2</b> | Cr 66.7 (12.9) N 97.4 (0.5) I                                            | I 94.9 (-0.7) N 40.0 (-6.6) Cr   |
| <b>5BF2</b> | Cr 78.1 (21.2) N 110.1 (1.2) I                                           | I 107.1 (-1.3) N 51.5 (-15.2) Cr |

<sup>a</sup> Cr<sub>1</sub>: crystal 1; Cr<sub>2</sub>: crystal 2; N: nematic mesophase phase; I: isotropic liquid.

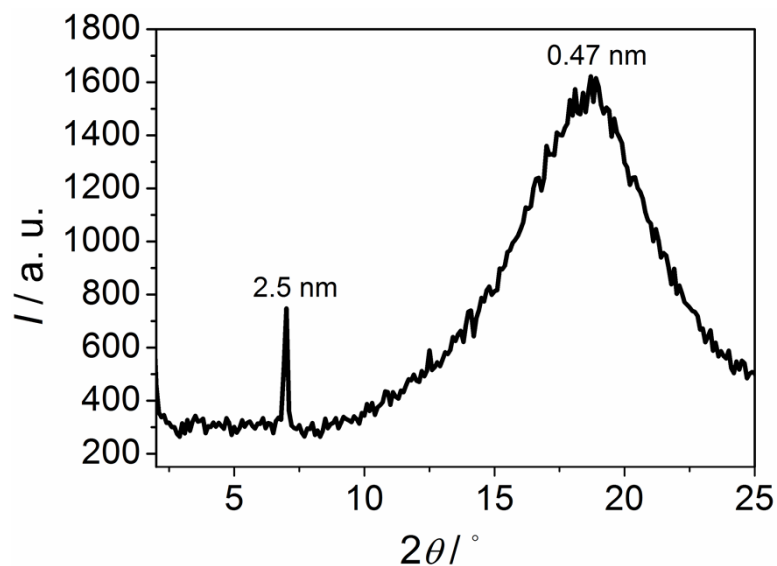

**Fig. S6.** X-ray scattering diagram ( $\theta$  - scans over the complete XRD pattern) of **2TF2** obtained at 100 °C on the sample gradually cooled from the isotropic state.

All the nematic phases of target compounds under investigation are evident from the XRD method that was performed for representative compound **2TF2**. As shown in Fig. S6, in the XRD pattern of the nematic phase diffuse wide-angle maxima is observed at  $d = 0.47$  nm, which corresponds to the mean lateral distance between the molecules and indicates fluid liquid crystal phase.<sup>[S1]</sup>

[S1] G. Shanker, M. Prehm, M. Nagaraj, J. K. Vij, M. Weyland, A. Eremin and C. Tschierske, *ChemPhysChem*, 2014, **15**, 1323–1335.

## 4. Geometric data

Optimized geometry for molecular **2BF2**

|   |              |             |             |
|---|--------------|-------------|-------------|
| C | 4.22429400   | -0.17494900 | -1.34893100 |
| C | 2.83676400   | -0.18634700 | -1.45790900 |
| C | 2.01681500   | -0.82079400 | -0.50744200 |
| C | 2.69089900   | -1.44297300 | 0.55179800  |
| C | 4.07280200   | -1.44278300 | 0.68137500  |
| C | 4.86853000   | -0.80248300 | -0.27427100 |
| H | 4.81718900   | 0.31637400  | -2.11569800 |
| H | 2.36524500   | 0.28427100  | -2.31507300 |
| C | 0.53772600   | -0.80915900 | -0.63105400 |
| C | -0.24724100  | -1.92949100 | -0.30858400 |
| C | -0.12179800  | 0.33458600  | -1.11026800 |
| C | -1.62968200  | -1.90211500 | -0.46902400 |
| H | 0.23034500   | -2.82980100 | 0.05971200  |
| C | -1.50551200  | 0.35489400  | -1.26707600 |
| H | 0.45476000   | 1.22427900  | -1.34582200 |
| C | -2.28786700  | -0.76228500 | -0.94997900 |
| H | -2.21011800  | -2.78805100 | -0.22193500 |
| H | -1.98714700  | 1.25680400  | -1.63757600 |
| F | 1.97733600   | -2.07423200 | 1.51568800  |
| C | 6.86712300   | 0.49411300  | 0.60700500  |
| H | 6.44083600   | 0.53192600  | 1.61611400  |
| H | 6.54352400   | 1.39831400  | 0.08076000  |
| C | -3.79521300  | -0.72515100 | -1.07703900 |
| H | -4.07219500  | -0.03357900 | -1.88044200 |
| H | -4.16268700  | -1.71555500 | -1.37590700 |
| C | -4.49136600  | -0.30908400 | 0.23591100  |
| H | -4.15290600  | -0.98370300 | 1.03338700  |
| H | -4.14416600  | 0.69342300  | 0.52273600  |
| C | -6.02975000  | -0.32315500 | 0.19234700  |
| C | -6.61768900  | -0.10634900 | 1.59907800  |
| C | -6.61734400  | 0.71561700  | -0.78066800 |
| H | -6.34916300  | -1.32103100 | -0.15110000 |
| C | -8.15248800  | -0.09908400 | 1.60125300  |
| H | -6.25012600  | 0.85314700  | 1.99256000  |
| H | -6.24487200  | -0.88115300 | 2.28090900  |
| C | -8.15423000  | 0.72376700  | -0.77628100 |
| H | -6.24842100  | 1.71265700  | -0.49611200 |
| H | -6.25917300  | 0.53344100  | -1.80045000 |
| C | -8.73885300  | 0.94222100  | 0.63099000  |
| H | -8.52411800  | 0.08764100  | 2.61685300  |
| H | -8.52070500  | -1.09614700 | 1.31664400  |
| H | -8.51535600  | 1.49488400  | -1.46620400 |
| H | -8.52292500  | -0.23728800 | -1.16606400 |
| H | -8.41408700  | 1.93788000  | 0.97641100  |
| C | -10.27787600 | 0.91798200  | 0.65445500  |
| H | -10.60866800 | 0.96700600  | 1.70063300  |
| H | -10.62504200 | -0.05337500 | 0.27418800  |
| C | -10.95501100 | 2.04612500  | -0.13195600 |
| H | -10.73273700 | 1.99192700  | -1.20239500 |
| H | -10.62645000 | 3.02916500  | 0.22492400  |
| H | 4.51178700   | -1.94653400 | 1.53715200  |

|   |              |             |             |
|---|--------------|-------------|-------------|
| C | 6.37396900   | -0.76306100 | -0.13404400 |
| H | 6.84126700   | -0.78756300 | -1.12380600 |
| H | 6.71773300   | -1.65719200 | 0.40082300  |
| C | 8.38025500   | 0.54050100  | 0.72629400  |
| O | 8.99865800   | 0.57704000  | -0.56407700 |
| H | 8.76371100   | -0.34826900 | 1.26191500  |
| C | 9.97991300   | 1.61568400  | -0.55970400 |
| C | 10.08269800  | 2.00297300  | 0.91939700  |
| H | 10.92114300  | 1.23657400  | -0.97200900 |
| H | 9.63628900   | 2.45770500  | -1.17472700 |
| H | 10.83617400  | 1.39302200  | 1.44101600  |
| H | 10.29367600  | 3.06039900  | 1.09277800  |
| O | 8.77454800   | 1.71665700  | 1.40191700  |
| H | -12.04348100 | 2.00171400  | -0.02213100 |

#### Optimized geometry for molecular **2TF2**

|   |             |             |             |
|---|-------------|-------------|-------------|
| C | 5.34133500  | -1.08044000 | -1.44831000 |
| C | 3.95412400  | -1.07965200 | -1.35549800 |
| C | 3.30501300  | -0.83085900 | -0.12938400 |
| C | 4.12990200  | -0.58404100 | 0.98153600  |
| C | 5.51292800  | -0.58381500 | 0.90071300  |
| C | 6.14407900  | -0.83431600 | -0.32471300 |
| H | 5.81156200  | -1.28221900 | -2.40682000 |
| H | 3.34492400  | -1.27785500 | -2.23101400 |
| C | 1.88998200  | -0.83980900 | -0.00748700 |
| C | 0.67726100  | -0.85938600 | 0.08203200  |
| C | -0.74102700 | -0.88981600 | 0.20418100  |
| C | -1.36202700 | -0.62477100 | 1.44080400  |
| C | -1.55628300 | -1.19843900 | -0.90256500 |
| C | -2.74666600 | -0.67288200 | 1.55854700  |
| H | -0.74503600 | -0.38999000 | 2.30200700  |
| C | -2.93942100 | -1.24339100 | -0.76854700 |
| H | -1.09137000 | -1.40884500 | -1.86034800 |
| C | -3.56225300 | -0.98416800 | 0.46100400  |
| H | -3.20583400 | -0.47257800 | 2.52356600  |
| H | -3.55022300 | -1.49164100 | -1.63320900 |
| F | 3.55188700  | -0.34514000 | 2.17453600  |
| C | 8.20791900  | 0.60567400  | -0.68498800 |
| H | 7.90838500  | 1.28607800  | 0.11908100  |
| H | 7.80617300  | 1.00824500  | -1.62198300 |
| C | -5.06895600 | -1.01107900 | 0.59024800  |
| H | -5.47300100 | -1.77258800 | -0.08586000 |
| H | -5.34366100 | -1.31892800 | 1.60726100  |
| C | -5.72411000 | 0.35337500  | 0.28785300  |
| H | -5.26992300 | 1.10841600  | 0.94293600  |
| H | -5.47248400 | 0.65403100  | -0.73878200 |
| C | -7.25190500 | 0.38811800  | 0.47089100  |
| C | -7.78712500 | 1.82810800  | 0.35883800  |
| C | -8.00077100 | -0.52014300 | -0.52199600 |
| H | -7.47723700 | 0.02884100  | 1.48861800  |
| C | -9.31057600 | 1.90257700  | 0.52978100  |
| H | -7.51214700 | 2.23278100  | -0.62651700 |
| H | -7.29402100 | 2.46710300  | 1.10236600  |
| C | -9.52637800 | -0.44375400 | -0.35367600 |



|   |              |             |             |
|---|--------------|-------------|-------------|
| H | -7.73266300  | -0.21857500 | -1.54584100 |
| H | -7.67683000  | -1.56165700 | -0.41248400 |
| C | -10.06139300 | 0.99615600  | -0.46247200 |
| H | -9.64941800  | 2.94021500  | 0.41584200  |
| H | -9.57542000  | 1.60276600  | 1.55476100  |
| H | -10.00674900 | -1.08923800 | -1.09782700 |
| H | -9.80286500  | -0.84840100 | 0.63174500  |
| H | -9.83787000  | 1.35949000  | -1.47921800 |
| C | -11.58372800 | 1.08957300  | -0.25530000 |
| H | -11.86464600 | 2.15100100  | -0.22745200 |
| H | -11.83333300 | 0.68587700  | 0.73634900  |
| C | -12.42853900 | 0.38366800  | -1.32181700 |
| H | -12.26299100 | -0.69815700 | -1.32867700 |
| H | -13.49673600 | 0.54845000  | -1.14696100 |
| H | -12.19557700 | 0.76089400  | -2.32434300 |
| H | 6.08765200   | -0.39354700 | 1.80175900  |
| C | 7.65237900   | -0.80816700 | -0.42879400 |
| H | 7.97307700   | -1.47474400 | -1.23894300 |
| H | 8.09811200   | -1.19402100 | 0.49373500  |
| C | 11.48142500  | 1.99264600  | -0.42991500 |
| O | 10.17843300  | 1.94015000  | -1.00107400 |
| C | 9.72440200   | 0.62266300  | -0.76970200 |
| C | 11.32281300  | 1.13345000  | 0.82817900  |
| H | 12.22851200  | 1.56406400  | -1.11543500 |
| H | 11.73223900  | 3.03690900  | -0.23174900 |
| H | 10.08401500  | -0.04693000 | -1.57350300 |
| H | 10.98232600  | 1.73046500  | 1.68433300  |
| H | 12.23962700  | 0.60352500  | 1.10737000  |
| O | 10.31556900  | 0.18916800  | 0.45954300  |

## 5. Vuks equation

$$\frac{n_e^2 - 1}{n^2 + 2} = \frac{N}{3\epsilon_0} \left[ \alpha + \frac{2\Delta\alpha S}{3} \right]$$

$$\frac{n_0^2 - 1}{n^2 + 2} = \frac{N}{3\epsilon_0} \left[ \alpha - \frac{2\Delta\alpha S}{3} \right]$$

$$n^2 = \frac{n_e^2 + 2n_0^2}{3}$$

$$\Delta n = n_e - n_0$$

$$\alpha = (\alpha_{//} + 2\alpha_{\perp})/3 = \frac{\alpha_{XX} + \alpha_{YY} + \alpha_{ZZ}}{3}$$

$$\Delta\alpha = \alpha_{//} - \alpha_{\perp} = \alpha_{XX} - \left( \frac{\alpha_{YY} + \alpha_{ZZ}}{2} \right)$$

## 6. The simulated molecular structure of 2BF2V

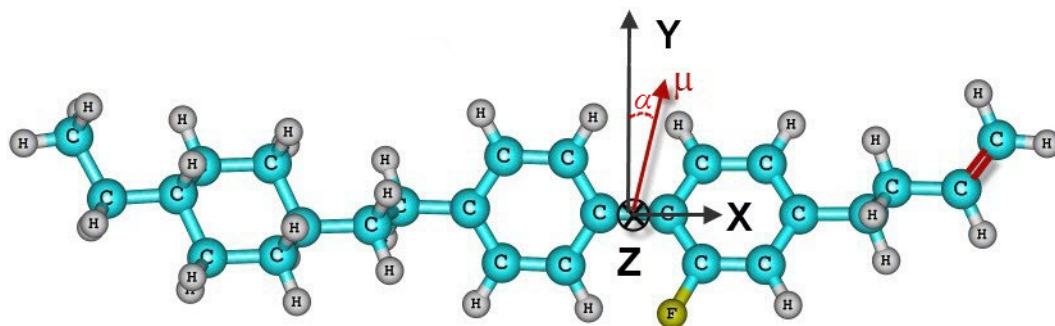

Fig. S7. The simulated molecular structure of 2BF2V.

$$\mu_x=0.1072, \mu_y=0.7320, \mu_z=0.3851$$

$$\mu = \sqrt{\mu_x^2 + \mu_y^2 + \mu_z^2}$$

$$\cos \alpha = \frac{\mu_y}{\mu} = 0.88$$

## 7. Compositions of mixtures SNULC-P01 and SNULC-P02

Table S2. Chemical structures and compositions of mixture SNULC-P01

| Code     | Compound Structures                                                                  | wt%   |
|----------|--------------------------------------------------------------------------------------|-------|
| 2H2BFB2V | 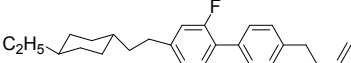   | 8.27  |
| 3H2BFB2V |    | 3.51  |
| 5H2BFB2V |    | 3.53  |
| 2H2HBF2  |    | 49.34 |
| 3H2HBF2  |    |       |
| 5H2HBF2  |    |       |
| 7HBF2    |    |       |
| 3HHBF3   |    |       |
| 3HBBF3   |  |       |
| 5HBBF3   |  |       |
| 3HHV     |  | 35.35 |

Table S3. Chemical structures and compositions of mixture SNULC-P02

| Code    | Compound Structures                                                                  | wt%   |
|---------|--------------------------------------------------------------------------------------|-------|
| 2BF2    | 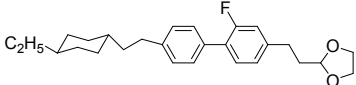   | 5.02  |
| 3TF2    |    | 4.03  |
| 5BF1    |    | 6.10  |
| 2H2HBF2 |    | 49.65 |
| 3H2HBF2 |    |       |
| 5H2HBF2 |    |       |
| 7HBF2   |     |       |
| 3HHBF3  |   |       |
| 3HBBF3  |  |       |
| 5HBBF3  |  |       |
| 3HHV    |   | 35.20 |
